# Supplementary material
Source: PubMed Central journal article supplement (PMC3445271)
Supplement: NIHMS390944-supplement-1_si_001.pdf [file NIHMS390944-supplement-1_si_001.pdf]

Three-Dimensional Structure and Determinants of Stability of the Iron-Sulfur Cluster Scaffold  
Protein IscU from *Escherichia coli*

Jin Hae Kim, Marco Tonelli, Taewook Kim, and John Markley

Supporting Information

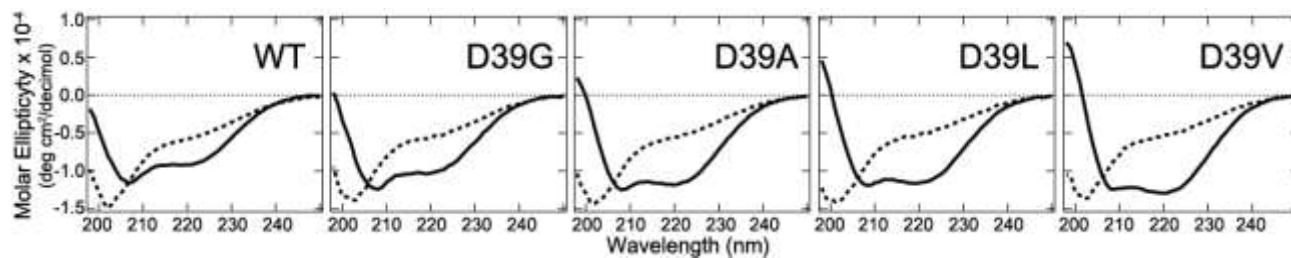

**Figure S1.** Far-UV circular dichroism (CD) spectra of apo-IscU variants taken at 25 °C (solid line) and 69 °C (dotted line). The CD signals at the wavelength of 197–200 nm and 222 nm indicate that apo-IscU variants wild-type (WT) and D39G IscU have less-ordered structures than D39A, D39L, and D39V. Note that the spectra taken at 69 °C are nearly indistinguishable between variants, indicating that spectral differences at 25 °C were not caused by an experimental artifact.

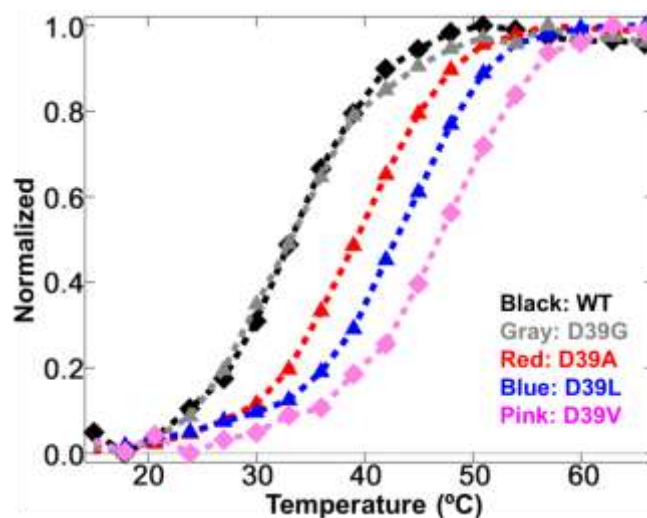

**Figure S2.** Thermal stabilities of the S-states of the apo-IscU variants (WT, black; D39G, gray; D39A, red; D39L, blue; D39V, pink) as measured by circular dichroism (CD) spectroscopy. CD signals at 222 nm were monitored as a function of increasing the temperature from 9 °C to 69 °C. The y-axis was normalized so that ‘0’ indicates maximal S-state and ‘1’ indicates minimal S-state state. The curves simply follow the experimental points. Apo-IscU(D39V) showed the highest S-state thermal stability, and apo-IscU(WT) and apo-IscU(D39G) showed the lowest (equivalent) thermal stability. Unpublished studies from our laboratory (Dai Z, Tonelli M, Markley JL, submitted) have shown that increasing temperature converts the S-state to the D-state and that the D-state is not fully unfolded in that it strongly stabilizes two *cis* peptidyl-prolyl peptide bonds. True unfolding probably occurs as a second transition at higher temperature. The unfolding transition may not be picked up by CD signals at 222 nm because the D-state of apo-IscU lacks secondary structure.<sup>1</sup>

## REFERENCE

1. Kim, J. H., Tonelli, M., and Markley, J. L. (2012) Disordered form of the scaffold protein IscU is the substrate for iron-sulfur cluster assembly on cysteine desulfurase, *Proc. Natl. Acad. Sci. U.S.A.* 109, 454-459.
